# Supplementary material
Source: PubMed Central journal article supplement (PMC3689191)
Supplement: cn400011f_si_001.pdf [file cn400011f_si_001.pdf]

**Supplementary Online Information**

**A $\beta$ 42-binding Peptoids as Amyloid Aggregation Inhibitors  
and Detection Ligands**

Yuan Luo<sup>1†</sup>, Sheetal Vali<sup>1†</sup>, Suya Sun<sup>1</sup>, Xuesong Chen<sup>1</sup>, Xia Liang<sup>1</sup>, Tatiana Drozhzhina<sup>2</sup>, Elena Popugaeva<sup>2</sup>, Ilya Bezprozvanny<sup>1,2\*</sup>

<sup>1</sup>Department of Physiology, University of Texas Southwestern Medical Center at Dallas, Dallas, TX 75390, USA

<sup>2</sup>Laboratory of Molecular Neurodegeneration, State Technical University, St Petersburg, 195251, Russia

<sup>†</sup>These authors contributed equally to this work

\*Corresponding author

IAM1

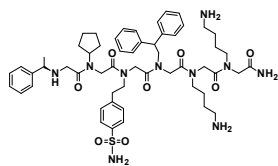

Nmba-Ncpa-Nbsa-Ndpe-Nlys-Nlys

IAM2

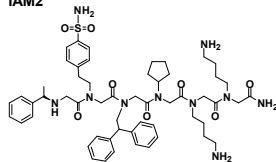

Nmba-Nbsa-Ndpe-Ncpa-Nlys-Nlys

IAM3

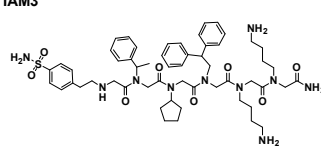

Nbsa-Nmba-Ncpa-Ndpe-Nlys-Nlys

IAM4

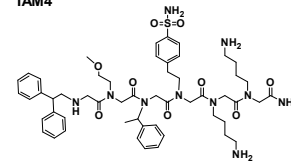

Ndpe-Nmea-Nmba-Nbsa-Nlys-Nlys

IAM5

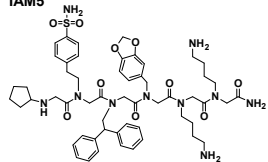

Ncpa-Nbsa-Ndpe-Npip-Nlys-Nlys

IAM6

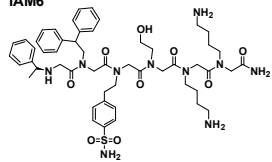

Nmba-Ndpe-Nbsa-Nser-Nlys-Nlys

IAM7

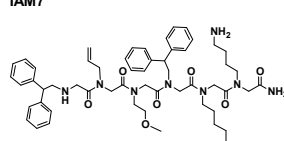

Ndpe-Nall-Nmea-Ndpe-Nlys-Nlys

IAM8

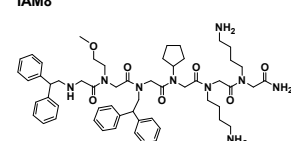

Ndpe-Nmea-Ndpe-Ncpa-Nlys-Nlys

IAM9

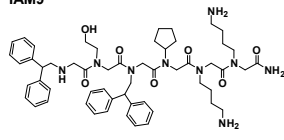

Ndpe-Nser-Ndpe-Ncpa-Nlys-Nlys

IAM10

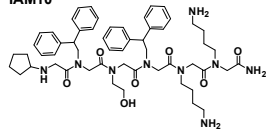

Ncpa-Ndpe-Nser-Ndpe-Nlys-Nlys

IAM11

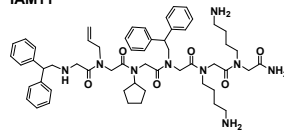

Ndpe-Nall-Ncpa-Ndpe-Nlys-Nlys

IAM12

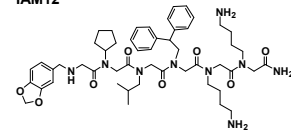

Npip-Ncpa-Nleu-Ndpe-Nlys-Nlys

IAM13

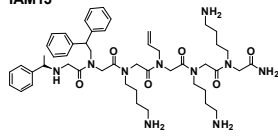

Nmba-Ndpe-Nlys-Nall-Nlys-Nlys

IAM14

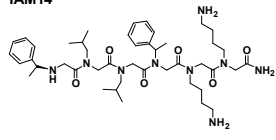

Nmba-Nleu-Nleu-Nmba-Nlys-Nlys

**Supplementary Figure 1: Chemical structures of the fourteen hits peptoids (IAM1-14) isolated from the library screening and sequenced by Edman degradation.**

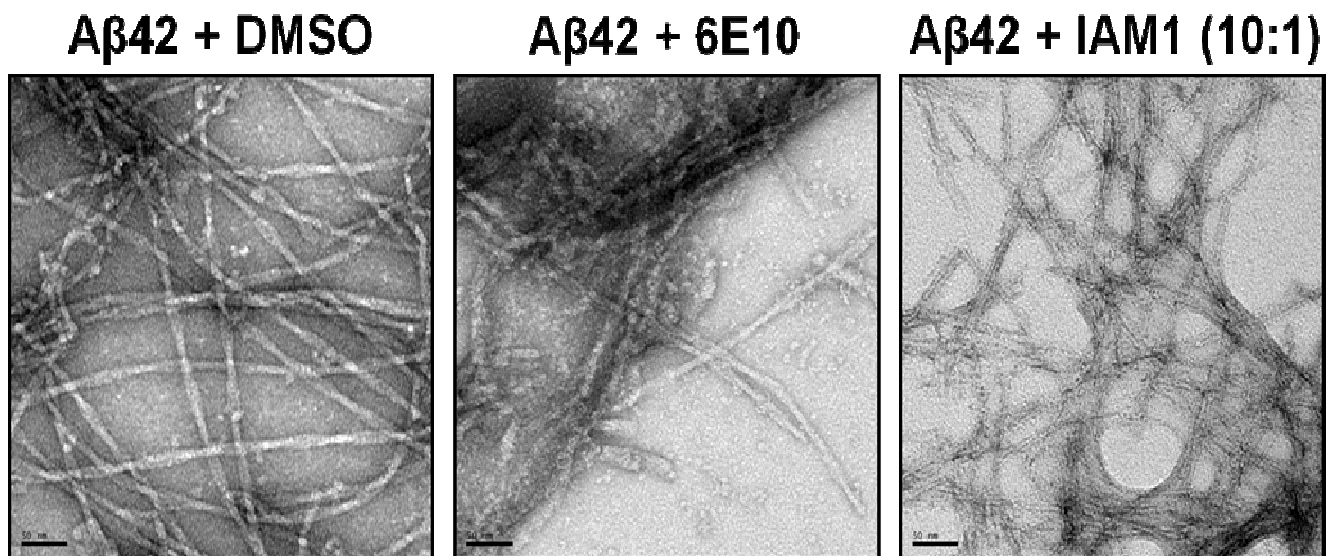

**Supplementary Figure 2: Transmission electron microscopic (TEM) analysis of the A $\beta$ 42 samples collected at the conclusion of the kinetic ThT assays in the presence of DMSO, 6E10 antibodies and IAM1 peptoid (10:1).**

**Supplementary Table 1: The MALDI-TOF mass spectrometry data for the peptoids.**

| <b>Compound</b>       | <b>Calculated mass</b> | <b>Mass found<br/>(M+H)<sup>+</sup></b> |
|-----------------------|------------------------|-----------------------------------------|
| <b>IAM1</b>           | 1036.56                | 1037.32                                 |
| <b>IAM1-biotin</b>    | 1390.73                | 1392.35                                 |
| <b>(IAM1)2</b>        | 2368.30                | 2370.84                                 |
| <b>(IAM1)2-biotin</b> | 2722.48                | 2725.53                                 |
| <b>RP</b>             | 779.57                 | 781.00                                  |
| <b>RP-biotin</b>      | 1133.75                | 1034.87                                 |
| <b>ASRI</b>           | 823.54                 | 824.68                                  |
| <b>ASRI-biotin</b>    | 1177.72                | 1178.80                                 |

## SUPPLEMENTARY METHODS

**MATERIALS AND EQUIPMENTS.** TentaGel macrobeads were purchased from Rapp Polymere. Rink Amide AM resin was purchased from Novabiochem. Preparative HPLC was performed on a Waters system with a C18 reversed-phase Peptide HPLC column. MALDI-TOF MS was performed on a Voyager-DE PRO biospectrometry Workstation (Applied Biosystems) using  $\alpha$ -hydroxyl cinnamic acid as the matrix. A Brunswick Scientific Innova 4400 incubator shaker was used to perform the peptoid syntheses. Edman sequencing of peptoids was performed on an ABI 476A Protein Sequencer (Applied Biosystems). On-bead fluorescence assays were visualized with an Olympus IX70 fluorescence microscope equipped with a DAPI filter set (410 nm excitation and 650 to 700 nm for emission) and a CCD camera. All the other chemical reagents were purchased from commercial sources and used without further purification.

**Synthesis of IAM1 attached to TentaGel macrobeads.** TentaGel macrobeads (50 mg, 24  $\mu$ mol) were incubated in N, N-dimethyl formamide (DMF, anhydrous) at room temperature for 1 h and then incubated with diisopropylcarbodiimide (DIC, 189 mg, 1.5 mmol, 1 M in 1.5 ml in DMF) and chloroacetic acid (CAA, 142 mg, 1.5 mmol, 1 M in 1.5 ml DMF) at 37°C for 1 h. After the reaction, beads were washed with DMF. Then N-(tert-butoxycarbonyl)-1,4-diaminobutane (282 mg, 1.5 mmol, 0.5 M in 3 ml NMP) was added to the beads and the reaction mixture was shaken at 37°C for 2 h. The beads were again washed with DMF. The above two steps were repeated once. Then the above two reaction steps were repeated four times in which N-(tert-butoxycarbonyl)-1,4-diaminobutane was replaced with 2,2-diphenylethylamine (296 mg, 1.5 mmol, 0.5 M in 3 ml NMP), 4-(2-aminoethyl)benzenesulfonamide (300 mg, 1.5 mmol, 0.5 M in 3 ml NMP), cyclopentylamine (128 mg, 1.5 mmol, 0.5 M in 3 ml NMP) and (R)-(+)- $\alpha$ -methyl-benzylamine (182 mg, 1.5 mmol, 0.5 M in 3 ml NMP), respectively. After the

completion of synthesis, beads were washed sequentially with DMF and methanol. Side chain protective groups were cleaved and the beads were again washed sequentially with DMF and dichloromethane and stored at 4 °C until further use.

**Synthesis of (IAM1)2.** Rink Amide AM resin (100 mg, 0.071 mmol; 200-400 mesh, capacity: 0.71 mmol/g) was incubated in DMF at room temperature for 1 h. The resin was then incubated with 4 ml 20 % piperidine in DMF with shaking at room temperature for 20 min. This reaction step was repeated once and the resin was washed with DMF. Then the resin was mixed with Fmoc-Lys(Dde)-OH (0.355 mmol, 189 mg), HBTU (0.355 mmol, 135 mg), HOBt (0.355 mmol, 48 mg) and N-methylmorpholine (0.71 mmol, 72 mg) in 4 ml DMF at room temperature for 3h. The resin was washed with DMF and then incubated with 4 ml 20 % piperidine in DMF with shaking at room temperature for 20 min. This reaction step was repeated once and the resin was washed with DMF. Then the resin was mixed with Fmoc- $\beta$ -Ala-OH (0.355 mmol, 111 mg; AnaSpec), HBTU (0.355 mmol, 135 mg), HOBt (0.355 mmol, 48 mg) and N-methylmorpholine (0.71 mmol, 72 mg) in 4 ml DMF at room temperature overnight. The resin was washed with DMF and then incubated with 4 ml 20 % piperidine in DMF at room temperature for 20 min. This reaction step was repeated once and the resin was washed with DMF. Then the resin was mixed with Fmoc-6-Ahx-OH (0.355 mmol, 125 mg; Fluka), HBTU (0.355 mmol, 135 mg), HOBt (0.355 mmol, 48 mg) and N-methylmorpholine (0.71 mmol, 72 mg) in 4 ml DMF at room temperature for 3 h. After this point, the synthesis procedure was similar to that in the synthesis of IAM1.

**Synthesis of biotin-IAM1, biotin-RP, biotin-ASR1 and biotin-(IAM1)2 attached to TentaGel macrobeads.** Rink Amide AM resin (100 mg, 0.071 mmol; 200-400 mesh, capacity: 0.71 mmol/g) was incubated in DMF at room temperature for 1 h. Then the resin

was incubated with 4 ml 20 % piperidine in DMF with shaking at room temperature for 20 min. This reaction step was repeated once and the resin was washed with DMF. The resin was mixed with Fmoc-Lys(Biotin)-OH (0.355 mmol, 211 mg), HBTU (0.355 mmol, 135 mg), HOBT (0.355 mmol, 48 mg) and N-methylmorpholine (0.71 mmol, 72 mg) in 4 ml DMF at room temperature overnight. The resin was washed with DMF and then incubated with 4 ml 20 % piperidine in DMF with shaking at room temperature for 20 min. This reaction step was repeated once and the resin was washed with DMF. After this point, the synthesis procedure was similar to the respective peptoid synthesis without biotin.
